# Supplementary material
Source: PubMed Central journal article supplement (PMC2632142)
Supplement: supp_75_3_589__1.pdf [file supp_75_3_589__1.pdf]

## seq\_align\_ORF

## Section 1

|                           |     |                                                               |    |    |    |    |    |
|---------------------------|-----|---------------------------------------------------------------|----|----|----|----|----|
|                           | (1) | 1                                                             | 10 | 20 | 30 | 40 | 58 |
| MIOX gene codon-optimized | (1) | ATGAAAGTGTGATGTTGGTCCGTGATCCGTCCTCTGGTTTATCGTCCAGACGTGGATCCGG |    |    |    |    |    |
| MIOX gene from mouse      | (1) | ATGAAAGTGTGATGTTGGTCCAGACCCCTCTCCCTGGTCTATCGACCCGATGTGGACCCAG |    |    |    |    |    |

## Section 2

|                           |      |                                                               |    |    |    |     |     |
|---------------------------|------|---------------------------------------------------------------|----|----|----|-----|-----|
|                           | (59) | 59                                                            | 70 | 80 | 90 | 100 | 116 |
| MIOX gene codon-optimized | (59) | AGATGGCAAAAGCAAAGACTCTTTCCGTAACTACACTTCTGGTCCGCTGCTGGATCCG    |    |    |    |     |     |
| MIOX gene from mouse      | (59) | AGATGGCAAAAGCAAAGACTCTTTCCGTAAGCTAACTACTTCAAGCCCGCTGCTGGATCCG |    |    |    |     |     |

## Section 3

|                           |       |                                                             |     |     |     |     |     |
|---------------------------|-------|-------------------------------------------------------------|-----|-----|-----|-----|-----|
|                           | (117) | 117                                                         | 130 | 140 | 150 | 160 | 174 |
| MIOX gene codon-optimized | (117) | CGTCTTCAAGACTACAAACTGATGCACACCCATCAGACCGTGTGATTTCCGTGAGCCGC |     |     |     |     |     |
| MIOX gene from mouse      | (117) | TGTCTTCAAGACTACAAACTGATGCACACTCACAGACTGTGGACTTCGTAGCAGG     |     |     |     |     |     |

## Section 4

|                           |       |                                                            |     |     |     |     |     |     |
|---------------------------|-------|------------------------------------------------------------|-----|-----|-----|-----|-----|-----|
|                           | (175) | 175                                                        | 180 | 190 | 200 | 210 | 220 | 232 |
| MIOX gene codon-optimized | (175) | AAGCGCATCCAGTATGGTTCTTTCTCTTACAAAGAGATGACCATATGGAGGCTGTGTG |     |     |     |     |     |     |
| MIOX gene from mouse      | (175) | AAGCGCATCCAGTATGGAAGCTTTCTCTTACAAAGAGATGACCATATGGAGGCTGTGG |     |     |     |     |     |     |

## Section 5

|                           |       |                                                              |     |     |     |     |     |     |
|---------------------------|-------|--------------------------------------------------------------|-----|-----|-----|-----|-----|-----|
|                           | (233) | 233                                                          | 240 | 250 | 260 | 270 | 280 | 290 |
| MIOX gene codon-optimized | (233) | GTATGCTGGATGACCTGGTTGACGAAAGCGACCCGTGACGTGACCTTCCCTAACTCTTT  |     |     |     |     |     |     |
| MIOX gene from mouse      | (233) | GCATGCTGGATGACTCTGGTTGACGAAAGCTGACCCAGACGTAGATTTCCTCAACTCTTT |     |     |     |     |     |     |

## Section 6

|                           |       |                                                            |     |     |     |     |     |
|---------------------------|-------|------------------------------------------------------------|-----|-----|-----|-----|-----|
|                           | (291) | 291                                                        | 300 | 310 | 320 | 330 | 348 |
| MIOX gene codon-optimized | (291) | CCATGCATTTAGACCCGCGAAGGTATTCGTAAAGCTCATCCGTGATAAAGATGGTTTC |     |     |     |     |     |
| MIOX gene from mouse      | (291) | CCACGCATTTCAGACCCGCGAAGGCATCCGGAAGCCCACTCCGGAAGGACTGGTTTC  |     |     |     |     |     |

## Section 7

|                           |       |                                                             |     |     |     |     |     |
|---------------------------|-------|-------------------------------------------------------------|-----|-----|-----|-----|-----|
|                           | (349) | 349                                                         | 360 | 370 | 380 | 390 | 406 |
| MIOX gene codon-optimized | (349) | CACCTGGTCGGTCTGCTGCACGACCTGGGTAAAGATCATGGCGCTGTGGGGCGAACCAC |     |     |     |     |     |
| MIOX gene from mouse      | (349) | CACCTGGTCGGACTTTCACGACTCTGGGTAAAGATCATGGCGCTGTGGGGCGAACCAC  |     |     |     |     |     |

## Section 8

|                           |       |                                                           |     |     |     |     |     |
|---------------------------|-------|-----------------------------------------------------------|-----|-----|-----|-----|-----|
|                           | (407) | 407                                                       | 420 | 430 | 440 | 450 | 464 |
| MIOX gene codon-optimized | (407) | AATGGGCGGTAGTGGCGATACCTTCCCGGTGGGCTGCCCGCCACAGGCATCCGTGGT |     |     |     |     |     |
| MIOX gene from mouse      | (407) | AGTGGGCGGTAGTGGCGATACCTTCCCGGTGGGCTGCCCGCCACAGGCATCCGTGGT |     |     |     |     |     |

## Section 9

|                           |       |                                                            |     |     |     |     |     |     |
|---------------------------|-------|------------------------------------------------------------|-----|-----|-----|-----|-----|-----|
|                           | (465) | 465                                                        | 470 | 480 | 490 | 500 | 510 | 522 |
| MIOX gene codon-optimized | (465) | CTTCTGCGACTCTACCTTCCAGGATAACCCGGATCTGCAGGATCCGCGCTATTCCAC  |     |     |     |     |     |     |
| MIOX gene from mouse      | (465) | GTTCTGCGACTCTACTTCCAGGACAACTCTGACTCTCAGGATCCCGCTATTCCAGCAC |     |     |     |     |     |     |

## Section 10

|                           |       |                                                            |     |     |     |     |     |     |
|---------------------------|-------|------------------------------------------------------------|-----|-----|-----|-----|-----|-----|
|                           | (523) | 523                                                        | 530 | 540 | 550 | 560 | 570 | 580 |
| MIOX gene codon-optimized | (523) | GAACTGGGCATGTACCAGCCGCAATGCGGCCTGGAGAACGTCTGATGTCCTGGGGTTC |     |     |     |     |     |     |
| MIOX gene from mouse      | (523) | GAACTCGGCATGTACCAGCCGCACTGTGGACTAGAGAACGTCTTATGTCCTGGGGCC  |     |     |     |     |     |     |

## seq\_align\_ORF

## Section 11

(581) 581 590 600 610 620 638  
 MIOX gene codon-optimized (581) A C G A C G A G T A C C T G T A T C A G A T G A T G A A A T T C A A C A A A T T C T C C C T G C C G T C C G A G G C  
 MIOX gene from mouse (581) A T G A T G A G T A C C T A T A C C A G A T G A T G A A G T T C A A C A A G T T C T C C C T G C C T T C A G A G G C

## Section 12

(639) 639 650 660 670 680 696  
 MIOX gene codon-optimized (639) A T T T A C A T G A T C C G T T T T C A C T C C T T C T A C C G T G G C A T A C C G G T G G C G A T T A T C G T  
 MIOX gene from mouse (639) C T T C A C A T G A T C C G A T T C C A C T C C T T C T A T C C G T G G C A C A C C G G C G G T G A C T A C C G G

## Section 13

(697) 697 710 720 730 740 754  
 MIOX gene codon-optimized (697) C A G C T G T G C T C T C A G C A G G A T C T G G A T A T G C T G C C G T G G G T T C A G G A G T T C A A T A A A T  
 MIOX gene from mouse (697) C A G C T G T G C A G C C A G C A G G A C C T G G A T A T G C T G C C C T G G G T G C A A G A G T T C A A C A A G T

## Section 14

(755) 755 760 770 780 790 800 812  
 MIOX gene codon-optimized (755) T C G A C C T G T A T A C C A A A T G C C C T G A C C T G C C A G A T G T T G A A T C C C T G C G C C C A T A C T A  
 MIOX gene from mouse (755) T T G A T C T C T A C A G A A G T G C C C T G A C C T A C C G A T G T G G A G A G C C T G C G G C C T A C T A

## Section 15

(813) 813 820 830 840 858  
 MIOX gene codon-optimized (813) C C A A G G C C T G A T T G A C A A A T A C T G C C C G G G C A C C C T G T C C T G G T A A  
 MIOX gene from mouse (813) T C A A G G G C T G A T T G A C A A G T A C T G C C C G G G C A C C C T G A G C T G G T G A
